# Supplementary material
Source: PubMed Central journal article supplement (PMC3658170)
Supplement: NIHMS472551-supplement-01.pdf [file NIHMS472551-supplement-01.pdf]

**Molecular Cell, Volume 50**

**Supplemental Information**

**Ribonucleotides Are Signals for Mismatch Repair  
of Leading-Strand Replication Errors**

**Scott A. Lujan, Jessica S. Williams, Anders R. Clausen, Alan B. Clark, and Thomas A. Kunkel**

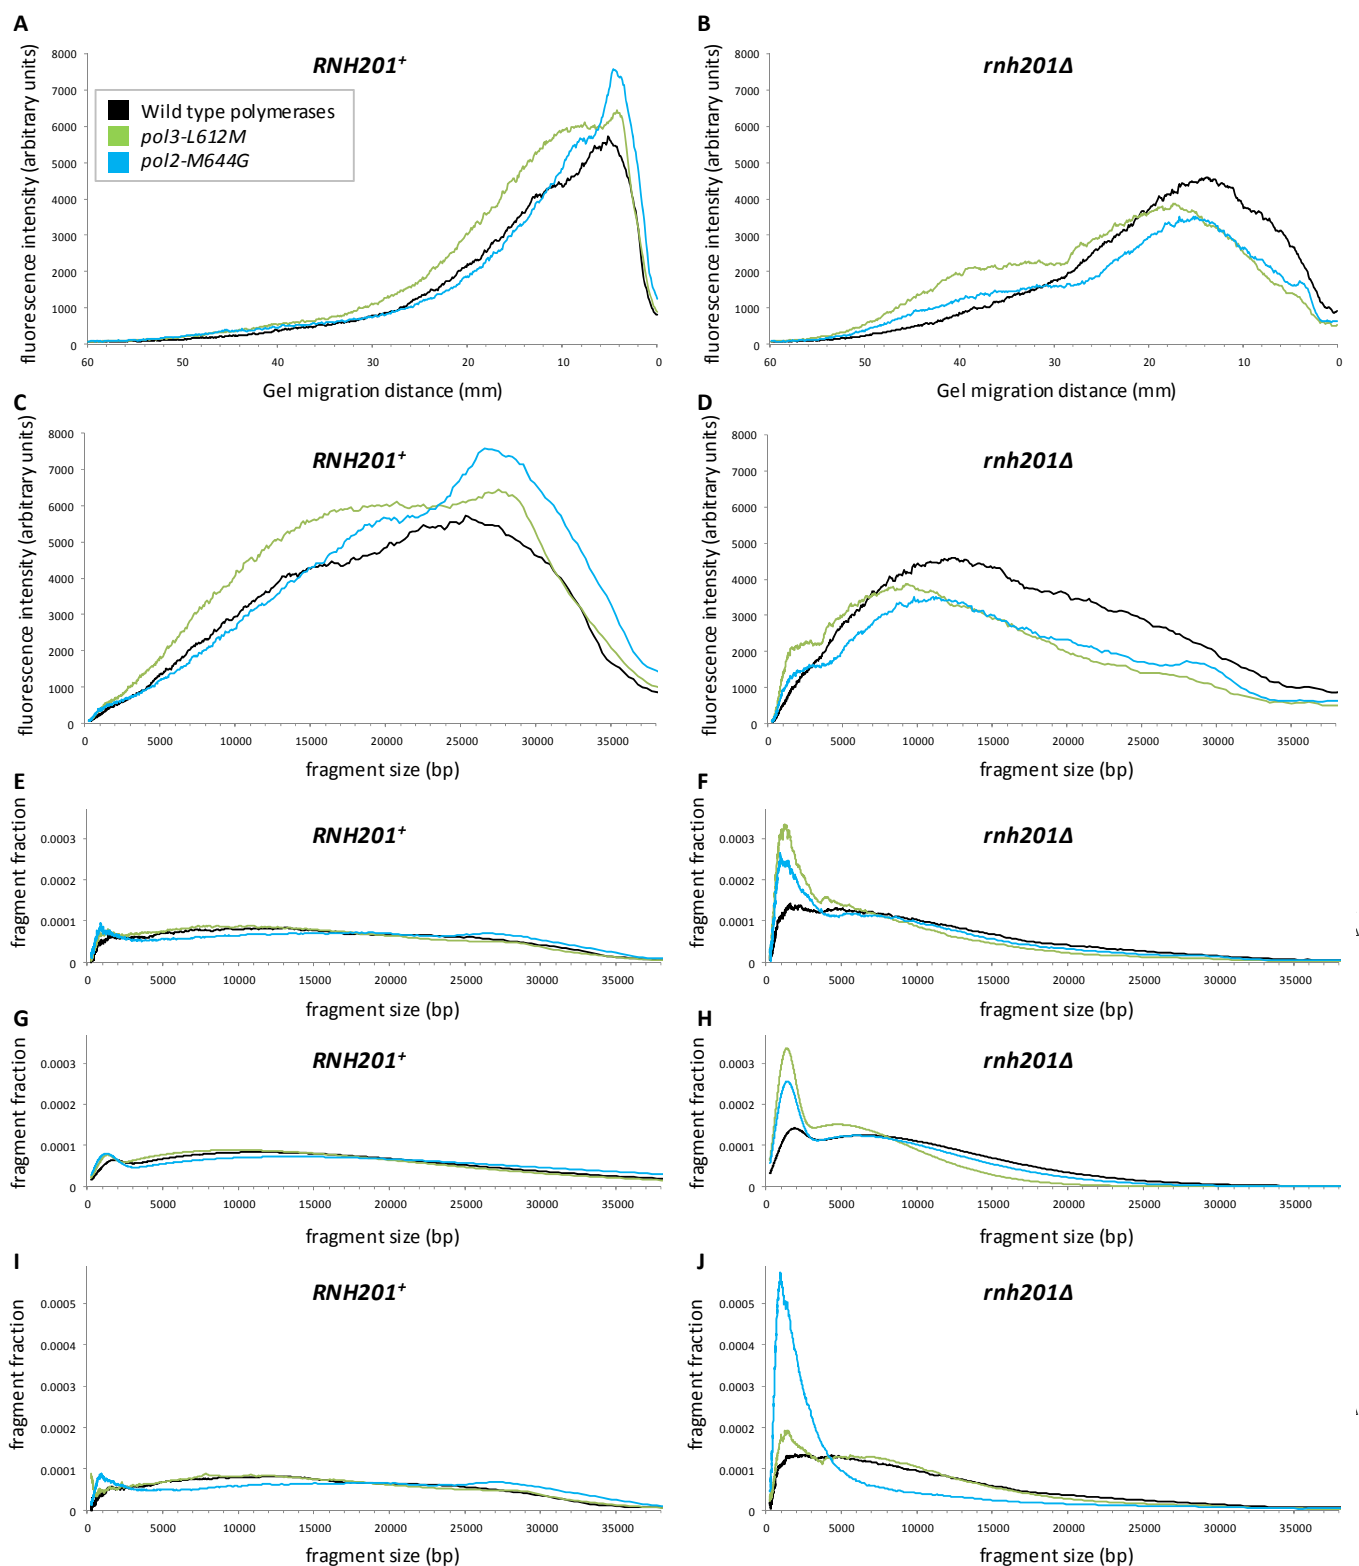

**Figure S1. Quantifying ribonucleotide incorporation using alkaline-hydrolysis data, Related to Figure 1.** Curves are derived from strains with wild type polymerases (black), the L612M Pol  $\delta$  mutator allele (green), or the M644G Pol  $\epsilon$  mutator allele using data from one of four independent experiments. Panels A-H refer to lagging strand data (Probe A in Fig. 1C). Panels I and J refer to

leading strand data (Probe B in Fig. 1C). **(A)** Fluorescence intensity curves for one representative alkaline-hydrolysis experiment with *RNH201*<sup>+</sup> strains (Fig. 1C, Probe A, *RNH201* = +). **(B)** As per panel A, but for *rnh201Δ* strains (Figure 1C, Probe A, *RNH201* = -). **(C)** An exponential transformation (constructed from ladder positions) is applied to convert gel migration distances from panel A into fragment sizes. **(D)** As per panel C, but for starting values from panel B. **(E)** Total intensities in each fragment size bin (panel C) are converted to average intensities per bin by dividing by bin width. The results are normalized to average fragment fractions by dividing by total lane intensity. **(F)** As per panel E, but with starting values from panel D. **(G)** Least squares regression of panel E data versus the sum of two Weibull distributions. The area under each curve yields the fraction of fragments in high- and low- mobility peaks. **(H)** As per panel G, but versus curves from panel F. **(I)** As per panel E, but with Probe B (leading strand). Analyses were performed as in panels A-H. **(J)** As per panel F, but with Probe B (leading strand). When comparing panels F and J, note that the fraction of fragments in the high mobility (Fig.1C) peaks track with *in vitro* ribonucleotide incorporation rates (Fig. 1A).

**Table S1. *pol2-M644G msh3Δ* mutation rates in two *URA3* orientations ± *MSH6* and/or *RNH201*, Related to Figure 2**

| <b><i>pol2-M644G msh3,6Δ/msh3Δ</i></b>                |                       | mutation rate (x10 <sup>-7</sup> ) | 95% confidence | 5-FOA <sup>R</sup> mutants | no <i>URA3</i> change | <i>URA3</i> mutations | Transitions |            | Frameshifts |             |            |
|-------------------------------------------------------|-----------------------|------------------------------------|----------------|----------------------------|-----------------------|-----------------------|-------------|------------|-------------|-------------|------------|
|                                                       |                       |                                    |                |                            |                       |                       | #           | rate       | #           | rate        |            |
| <b>URA3 orientation 1</b>                             | <b><i>RNH201</i></b>  | msh3Δ                              | 1.6            | (1.1-2.5)                  | 122                   | 15                    | 109         | 9          | 0.12        | 50          | 0.66       |
|                                                       |                       | msh3,6Δ                            | 110            | (88-140)                   | 173                   | 16                    | 166         | 67         | 43          | 56          | 36         |
|                                                       |                       | correction factors                 |                |                            |                       |                       |             |            |             | <b>360x</b> | <b>54x</b> |
|                                                       | <b><i>rnh201Δ</i></b> | msh3Δ                              | 11.0           | (8.8-14)                   | 137                   | 17                    | 120         | 19         | 1.5         | 26          | 2.1        |
|                                                       |                       | msh3,6Δ                            | 250            | (170-350)                  | 164                   | 18                    | 154         | 64         | 98          | 67          | 100        |
|                                                       |                       | correction factors                 |                |                            |                       |                       |             |            |             | <b>64x</b>  | <b>49x</b> |
| <b><i>RNH201/rnh201Δ</i> correction factor ratios</b> |                       |                                    |                |                            |                       |                       |             | <b>5.6</b> | <b>1.1</b>  |             |            |
| p-values                                              |                       |                                    |                |                            |                       |                       |             | ≤ 0.001    | 0.430       |             |            |
| <b>URA3 orientation 2</b>                             | <b><i>RNH201</i></b>  | msh3Δ                              | 2.90           | (2.2-3.9)                  | 125                   | 17                    | 108         | 4          | 0.093       | 88          | 2.0        |
|                                                       |                       | msh3,6Δ                            | 280            | (220-370)                  | 158                   | 16                    | 144         | 34         | 60          | 80          | 140        |
|                                                       |                       | correction factors                 |                |                            |                       |                       |             |            |             | <b>650x</b> | <b>69x</b> |
|                                                       | <b><i>rnh201Δ</i></b> | msh3Δ                              | 15             | (11-21)                    | 139                   | 21                    | 118         | 3          | 0.32        | 33          | 3.6        |
|                                                       |                       | msh3,6Δ                            | 280            | (210-360)                  | 122                   | 22                    | 102         | 30         | 69          | 54          | 120        |
|                                                       |                       | correction factors                 |                |                            |                       |                       |             |            |             | <b>210x</b> | <b>35x</b> |
| <b><i>RNH201/rnh201Δ</i> correction factor ratios</b> |                       |                                    |                |                            |                       |                       |             | <b>3.1</b> | <b>2.0</b>  |             |            |
| p-values                                              |                       |                                    |                |                            |                       |                       |             | 0.10       | 0.015       |             |            |

For comparison, all rates are listed by strain in Table S6. All rates are multiplied by 10<sup>7</sup>. C.f. stands for correction factor. Correction factors are compared in Fig. 2A, listed as "*msh3,6Δ/msh3Δ*". Strain origins and related references may be found in Table S5.

**Table S2. *pol2-M644G* mutation rates in two *URA3* orientations  $\pm$  *MMR* and/or *RNH201*, Related to Figure 2**

| <b><i>pol2-M644G</i><br/><i>msh3,6Δ</i>/wt MMR</b>    |                       | mutation<br>rate ( $\times 10^{-7}$ ) | 95%<br>confidence | 5-FOA <sup>R</sup><br>mutants | no <i>URA3</i><br>change | <i>URA3</i><br>mutations | Transitions |              | Frameshifts |              |               |
|-------------------------------------------------------|-----------------------|---------------------------------------|-------------------|-------------------------------|--------------------------|--------------------------|-------------|--------------|-------------|--------------|---------------|
|                                                       |                       |                                       |                   |                               |                          |                          | #           | rate         | #           | rate         |               |
| <b>URA3 orientation 1</b>                             | <b><i>RNH201</i></b>  | wt MMR                                | 1.7               | (1.3-2.3)                     | 342                      | 105                      | 237         | 24           | 0.12        | 12           | 0.060         |
|                                                       |                       | <i>msh3,6Δ</i>                        | 110               | (88-140)                      | 173                      | 16                       | 166         | 67           | 43          | 56           | 36            |
|                                                       |                       | correction factors                    |                   |                               |                          |                          |             |              |             | <b>360x</b>  | <b>600x</b>   |
|                                                       | <b><i>rnh201Δ</i></b> | wt MMR                                | 7.6               | (4.3-10)                      | 128                      | 4                        | 125         | 25           | 1.5         | 7            | 0.42          |
|                                                       |                       | <i>msh3,6Δ</i>                        | 250               | (170-350)                     | 164                      | 18                       | 154         | 64           | 98          | 67           | 100           |
|                                                       |                       | correction factors                    |                   |                               |                          |                          |             |              |             | <b>66x</b>   | <b>250x</b>   |
| <b><i>RNH201/rnh201Δ</i> correction factor ratios</b> |                       |                                       |                   |                               |                          |                          |             | <b>5.4</b>   |             | <b>2.4</b>   |               |
| p-values                                              |                       |                                       |                   |                               |                          |                          |             | $\leq 0.001$ |             | 0.083        |               |
| <b>URA3 orientation 2</b>                             | <b><i>RNH201</i></b>  | wt MMR                                | 0.83              | (0.71-0.96)                   | 246                      | 123                      | 124         | 36           | 0.12        | 14           | 0.047         |
|                                                       |                       | <i>msh3,6Δ</i>                        | 280               | (220-370)                     | 158                      | 16                       | 144         | 34           | 60          | 80           | 140           |
|                                                       |                       | correction factors                    |                   |                               |                          |                          |             |              |             | <b>500x</b>  | <b>3,000x</b> |
|                                                       | <b><i>rnh201Δ</i></b> | wt MMR                                | 14                | (9.8-20)                      | 138                      | 0                        | 138         | 5            | 0.51        | 7            | 0.71          |
|                                                       |                       | <i>msh3,6Δ</i>                        | 280               | (210-360)                     | 122                      | 22                       | 102         | 30           | 69          | 54           | 120           |
|                                                       |                       | correction factors                    |                   |                               |                          |                          |             |              |             | <b>140x</b>  | <b>170x</b>   |
| <b><i>RNH201/rnh201Δ</i> correction factor ratios</b> |                       |                                       |                   |                               |                          |                          |             | <b>3.7</b>   |             | <b>17</b>    |               |
| p-values                                              |                       |                                       |                   |                               |                          |                          |             | 0.058        |             | $\leq 0.001$ |               |

  

| <b><i>pol2-M644G</i><br/><i>msh2Δ</i>/wt MMR</b>      |                       | mutation<br>rate ( $\times 10^{-7}$ ) | 95%<br>confidence | 5-FOA <sup>R</sup><br>mutants | no <i>URA3</i><br>mutations | <i>URA3</i><br>mutations | Transitions |              | Frameshifts |             |               |
|-------------------------------------------------------|-----------------------|---------------------------------------|-------------------|-------------------------------|-----------------------------|--------------------------|-------------|--------------|-------------|-------------|---------------|
|                                                       |                       |                                       |                   |                               |                             |                          | #           | rate         | #           | rate        |               |
| <b>URA3 orientation 1</b>                             | <b><i>RNH201</i></b>  | wt MMR                                | 1.7               | (1.3-2.3)                     | 342                         | 105                      | 237         | 24           | 0.12        | 12          | 0.060         |
|                                                       |                       | <i>msh2Δ</i>                          | 180               | (120-270)                     | 333                         | 35                       | 306         | 92           | 50          | 162         | 88            |
|                                                       |                       | correction factors                    |                   |                               |                             |                          |             |              |             | <b>420x</b> | <b>1,500x</b> |
|                                                       | <b><i>rnh201Δ</i></b> | wt MMR                                | 7.6               | (4.3-10)                      | 128                         | 4                        | 125         | 25           | 1.5         | 7           | 0.42          |
|                                                       |                       | <i>msh3,6Δ</i>                        | 250               | (170-350)                     | 164                         | 18                       | 154         | 64           | 98          | 67          | 100           |
|                                                       |                       | correction factors                    |                   |                               |                             |                          |             |              |             | <b>66x</b>  | <b>250x</b>   |
| <b><i>RNH201/rnh201Δ</i> correction factor ratios</b> |                       |                                       |                   |                               |                             |                          |             | <b>6.3</b>   |             | <b>6.0</b>  |               |
| p-values                                              |                       |                                       |                   |                               |                             |                          |             | $\leq 0.001$ |             | 0.009       |               |
| <b>URA3 orientation 2</b>                             | <b><i>RNH201</i></b>  | wt MMR                                | 0.83              | (0.71-0.96)                   | 246                         | 123                      | 124         | 36           | 0.12        | 14          | 0.047         |
|                                                       |                       | <i>msh2Δ</i>                          | 180               | (100-220)                     | 254                         | 38                       | 224         | 83           | 59          | 85          | 60            |
|                                                       |                       | correction factors                    |                   |                               |                             |                          |             |              |             | <b>480x</b> | <b>1,300x</b> |
|                                                       | <b><i>rnh201Δ</i></b> | wt MMR                                | 14                | (9.8-20)                      | 138                         | 0                        | 138         | 5            | 0.51        | 7           | 0.71          |
|                                                       |                       | <i>msh3,6Δ</i>                        | 280               | (210-360)                     | 122                         | 22                       | 102         | 30           | 69          | 54          | 120           |
|                                                       |                       | correction factors                    |                   |                               |                             |                          |             |              |             | <b>140x</b> | <b>170x</b>   |
| <b><i>RNH201/rnh201Δ</i> correction factor ratios</b> |                       |                                       |                   |                               |                             |                          |             | <b>3.6</b>   |             | <b>7.3</b>  |               |
| p-values                                              |                       |                                       |                   |                               |                             |                          |             | 0.066        |             | 0.004       |               |

Some data is repeated from previous tables and between panels. For comparison, all rates are listed by strain in Table S6. All rates are multiplied by  $10^7$ . C.f. stands for correction factor. Correction factors are compared in Fig. 2A, listed as "*msh3,6Δ*/wt MMR" (above) and "*msh2Δ*/wt MMR" (below). Strain origins and related references may be found in Table S5.

**Table S3. *pol3-L612M* mutation rates in two *URA3* orientations  $\pm$  *MSH6* and/or *RNH201*, Related to Figure 2**

| <i>pol3-L612M</i><br><i>msh6Δ/wt MMR</i>              |                                                       | mutation<br>rate ( $\times 10^{-7}$ ) | 95%<br>confidence | 5-FOA <sup>R</sup><br>mutants | no <i>URA3</i><br>change | <i>URA3</i><br>mutations | Transitions |              | Frameshifts |             |             |
|-------------------------------------------------------|-------------------------------------------------------|---------------------------------------|-------------------|-------------------------------|--------------------------|--------------------------|-------------|--------------|-------------|-------------|-------------|
|                                                       |                                                       |                                       |                   |                               |                          |                          | #           | rate         | #           | rate        |             |
| URA3 orientation 1                                    | <i>RNH201</i>                                         | wt MMR                                | 1.4               | (1.1-1.8)                     | 245                      | 72                       | 173         | 112          | 0.64        | 20          | 0.11        |
|                                                       |                                                       | <i>msh6Δ</i>                          | 170               | (130-230)                     | 313                      | 14                       | 310         | 271          | 150         | 6           | 3.3         |
|                                                       |                                                       | correction factors                    |                   |                               |                          |                          |             |              | <b>230x</b> |             | <b>29x</b>  |
|                                                       | <i>rnh201Δ</i>                                        | wt MMR                                | 1.4               | (0.97-2.1)                    | 151                      | 28                       | 123         | 60           | 0.56        | 22          | 0.20        |
|                                                       |                                                       | <i>msh6Δ</i>                          | 180               | (130-260)                     | 142                      | 13                       | 132         | 117          | 150         | 8           | 10          |
|                                                       |                                                       | correction factors                    |                   |                               |                          |                          |             |              | <b>270x</b> |             | <b>50x</b>  |
|                                                       | <b><i>RNH201/rnh201Δ</i> correction factor ratios</b> |                                       |                   |                               |                          |                          |             |              | <b>0.9</b>  |             | <b>0.6</b>  |
|                                                       | p-values                                              |                                       |                   |                               |                          |                          |             |              | 0.370       |             | 0.230       |
|                                                       | URA3 orientation 2                                    | <i>RNH201</i>                         | wt MMR            | 2.30                          | (2.0-2.7)                | 243                      | 45          | 198          | 87          | 0.82        | 34          |
| <i>msh6Δ</i>                                          |                                                       |                                       | 160               | (130-210)                     | 354                      | 27                       | 335         | 241          | 110         | 5           | 2.3         |
| correction factors                                    |                                                       |                                       |                   |                               |                          |                          |             |              | <b>130x</b> |             | <b>7.0x</b> |
| <i>rnh201Δ</i>                                        |                                                       | wt MMR                                | 1                 | (0.84-1.5)                    | 188                      | 45                       | 143         | 45           | 0.26        | 23          | 0.13        |
|                                                       |                                                       | <i>msh6Δ</i>                          | 180               | (140-230)                     | 70                       | 4                        | 71          | 57           | 150         | 1           | 2.6         |
|                                                       |                                                       | correction factors                    |                   |                               |                          |                          |             |              | <b>570x</b> |             | <b>19x</b>  |
| <b><i>RNH201/rnh201Δ</i> correction factor ratios</b> |                                                       |                                       |                   |                               |                          |                          |             | <b>0.23</b>  |             | <b>0.37</b> |             |
| p-values                                              |                                                       |                                       |                   |                               |                          |                          |             | $\leq 0.001$ |             | 0.021       |             |

For comparison, all rates are listed by strain in Table S6. All rates are multiplied by  $10^7$ . Correction factors are compared in Fig. 2B, listed as "*msh6Δ/wt MMR*". Strain origins and related references may be found in Table S5.

**Table S4. Mutation rates in a wild type polymerase background for two *URA3* orientations  $\pm$  *MMR* and/or *RNH201*, Related to Figure 2**

| wild type pols<br><i>msh3,6Δ/wt MMR</i>               |                                                       | mutation<br>rate ( $\times 10^{-7}$ ) | 95%<br>confidence | 5-FOA <sup>R</sup><br>mutants | no <i>URA3</i><br>change | <i>URA3</i><br>mutations | Transitions |            | Frameshifts |              |             |
|-------------------------------------------------------|-------------------------------------------------------|---------------------------------------|-------------------|-------------------------------|--------------------------|--------------------------|-------------|------------|-------------|--------------|-------------|
|                                                       |                                                       |                                       |                   |                               |                          |                          | #           | rate       | #           | rate         |             |
| URA3 orientation 1                                    | <i>RNH201</i>                                         | wt MMR                                | 0.2               | (0.14-0.23)                   | 211                      | 70                       | 141         | 47         | 0.040       | 11           | 0.0094      |
|                                                       |                                                       | <i>msh3,6Δ</i>                        | 8                 | (6.1-11)                      | 228                      | 63                       | 170         | 38         | 1.4         | 100          | 3.6         |
|                                                       |                                                       | correction factors                    |                   |                               |                          |                          |             |            | <b>34x</b>  |              | <b>380x</b> |
|                                                       | <i>rnh201Δ</i>                                        | wt MMR                                | 0.3               | (0.22-0.46)                   | 251                      | 95                       | 156         | 32         | 0.041       | 27           | 0.034       |
|                                                       |                                                       | <i>msh3,6Δ</i>                        | 10                | (6.5-14)                      | 298                      | 92                       | 206         | 76         | 2.4         | 98           | 3.2         |
|                                                       |                                                       | correction factors                    |                   |                               |                          |                          |             |            | <b>60x</b>  |              | <b>92x</b>  |
|                                                       | <b><i>RNH201/rnh201Δ</i> correction factor ratios</b> |                                       |                   |                               |                          |                          |             | <b>0.6</b> |             | <b>4.1</b>   |             |
|                                                       | p-values                                              |                                       |                   |                               |                          |                          |             | 0.083      |             | $\leq 0.001$ |             |
|                                                       | URA3 orientation 2                                    | <i>RNH201</i>                         | wt MMR            | 0.21                          | (0.16-0.27)              | 257                      | 99          | 158        | 43          | 0.035        | 14          |
| <i>msh3,6Δ</i>                                        |                                                       |                                       | 8                 | (6.1-10)                      | 258                      | 79                       | 186         | 32         | 0.97        | 113          | 3.4         |
| correction factors                                    |                                                       |                                       |                   |                               |                          |                          |             |            | <b>28x</b>  |              | <b>300x</b> |
| <i>rnh201Δ</i>                                        |                                                       | wt MMR                                | 1                 | (0.43-0.75)                   | 273                      | 62                       | 211         | 32         | 0.075       | 14           | 0.033       |
|                                                       |                                                       | <i>msh3,6Δ</i>                        | 12                | (8.8-17)                      | 244                      | 49                       | 196         | 37         | 1.8         | 99           | 4.9         |
|                                                       |                                                       | correction factors                    |                   |                               |                          |                          |             |            | <b>24x</b>  |              | <b>150x</b> |
| <b><i>RNH201/rnh201Δ</i> correction factor ratios</b> |                                                       |                                       |                   |                               |                          |                          | <b>1.1</b>  |            | <b>2.0</b>  |              |             |
| p-values                                              |                                                       |                                       |                   |                               |                          |                          | 0.38        |            | 0.069       |              |             |

  

| wild type pols<br><i>msh2Δ/wt MMR</i>                 |                                                       | mutation<br>rate ( $\times 10^{-7}$ ) | 95%<br>confidence | 5-FOA <sup>R</sup><br>mutants | no <i>URA3</i><br>change | <i>URA3</i><br>mutations | Transitions |             | Frameshifts |              |             |
|-------------------------------------------------------|-------------------------------------------------------|---------------------------------------|-------------------|-------------------------------|--------------------------|--------------------------|-------------|-------------|-------------|--------------|-------------|
|                                                       |                                                       |                                       |                   |                               |                          |                          | #           | rate        | #           | rate         |             |
| URA3 orientation 1                                    | <i>RNH201</i>                                         | wt MMR                                | 0.2               | (0.14-0.23)                   | 211                      | 70                       | 141         | 47          | 0.040       | 11           | 0.0094      |
|                                                       |                                                       | <i>msh2Δ</i>                          | 7                 | (3.5-15)                      | 195                      | 15                       | 180         | 41          | 1.5         | 118          | 4.4         |
|                                                       |                                                       | correction factors                    |                   |                               |                          |                          |             |             | <b>38x</b>  |              | <b>460x</b> |
|                                                       | <i>rnh201Δ</i>                                        | wt MMR                                | 0.3               | (0.22-0.46)                   | 251                      | 95                       | 156         | 32          | 0.041       | 27           | 0.034       |
|                                                       |                                                       | <i>msh3,6Δ</i>                        | 10                | (6.5-14)                      | 298                      | 92                       | 206         | 76          | 2.4         | 98           | 3.2         |
|                                                       |                                                       | correction factors                    |                   |                               |                          |                          |             |             | <b>60x</b>  |              | <b>92x</b>  |
|                                                       | <b><i>RNH201/rnh201Δ</i> correction factor ratios</b> |                                       |                   |                               |                          |                          |             | <b>0.63</b> |             | <b>5.1</b>   |             |
|                                                       | p-values                                              |                                       |                   |                               |                          |                          |             | 0.17        |             | $\leq 0.001$ |             |
|                                                       | URA3 orientation 2                                    | <i>RNH201</i>                         | wt MMR            | 0.21                          | (0.16-0.27)              | 257                      | 99          | 158         | 43          | 0.035        | 14          |
| <i>msh2Δ</i>                                          |                                                       |                                       | 10                | (6.7-13)                      | 193                      | 12                       | 181         | 23          | 1.1         | 113          | 5.6         |
| correction factors                                    |                                                       |                                       |                   |                               |                          |                          |             |             | <b>32x</b>  |              | <b>490x</b> |
| <i>rnh201Δ</i>                                        |                                                       | wt MMR                                | 1                 | (0.43-0.75)                   | 273                      | 62                       | 211         | 32          | 0.075       | 14           | 0.033       |
|                                                       |                                                       | <i>msh3,6Δ</i>                        | 12                | (8.8-17)                      | 244                      | 49                       | 196         | 37          | 1.8         | 99           | 4.9         |
|                                                       |                                                       | correction factors                    |                   |                               |                          |                          |             |             | <b>24x</b>  |              | <b>150x</b> |
| <b><i>RNH201/rnh201Δ</i> correction factor ratios</b> |                                                       |                                       |                   |                               |                          |                          | <b>1.3</b>  |             | <b>3.3</b>  |              |             |
| p-values                                              |                                                       |                                       |                   |                               |                          |                          | 0.29        |             | 0.007       |              |             |

Some data is repeated from previous tables and between panels. For comparison, all rates are listed by strain in Table S6. All rates are multiplied by  $10^7$ . Correction factors are compared in Fig. 2C, listed as "*msh3,6Δ/wt MMR*" (above) and "*msh2Δ/wt MMR*" (below). Strain origins and related references may be found in Table S5.

**Table S5. Strains used in this study, Related to Figures 1 and 2 and Table 1**

| strain | strain origin                                                                               | ploidy  | polymerase alleles | other genotype notes     | data set origin                              |
|--------|---------------------------------------------------------------------------------------------|---------|--------------------|--------------------------|----------------------------------------------|
| h001   | see reference and dissected from diploid d011 or d041 or d081                               | haploid | wild type          | URA3 OR1                 | expanded from (Nick McElhinny et al., 2010a) |
| h002   | see reference and dissected from diploid d012 or d042 or d082                               | haploid | wild type          | URA3 OR2                 | expanded from (Nick McElhinny et al., 2010a) |
| h011   | see reference and dissected from diploid d011                                               | haploid | wild type          | msh2Δ URA3 OR1           | expanded from (Nick McElhinny et al., 2010a) |
| h012   | see reference and dissected from diploid d012                                               | haploid | wild type          | msh2Δ URA3 OR2           | expanded from (Nick McElhinny et al., 2010a) |
| h041   | dissected from diploid d041 or d081                                                         | haploid | wild type          | msh3,6Δ URA3 OR1         | this study                                   |
| h042   | dissected from diploid d042 or d082                                                         | haploid | wild type          | msh3,6Δ URA3 OR2         | this study                                   |
| h051   | see reference (SNM106)                                                                      | haploid | wild type          | rnh201Δ URA3 OR1         | from (Clark et al., 2011)                    |
| h052   | see reference (SNM114)                                                                      | haploid | wild type          | rnh201Δ URA3 OR2         | from (Clark et al., 2011)                    |
| h081   | dissected from diploid d081                                                                 | haploid | wild type          | msh3,6Δ rnh201Δ URA3 OR1 | this study                                   |
| h082   | dissected from diploid d082                                                                 | haploid | wild type          | msh3,6Δ rnh201Δ URA3 OR2 | this study                                   |
| h201   | see reference (DTA201) and dissected from diploid d211                                      | haploid | pol2-M644G         | URA3 OR1                 | expanded from (Pursell et al., 2007)         |
| h202   | see reference (DTA202) and dissected from diploid d212                                      | haploid | pol2-M644G         | URA3 OR2                 | expanded from (Pursell et al., 2007)         |
| h201ML | SNM82 (Nick McElhinny et al., 2010b)                                                        | haploid | pol2-M644L         | URA3 OR1                 | this study                                   |
| h202ML | SNM90 (Nick McElhinny et al., 2010b)                                                        | haploid | pol2-M644L         | URA3 OR2                 | this study                                   |
| h211   | DTA201 and dissected from diploid d211                                                      | haploid | pol2-M644G         | msh2Δ URA3 OR1           | from (Lujan et al., 2012)                    |
| h212   | DTA202 and dissected from diploid d212                                                      | haploid | pol2-M644G         | msh2Δ URA3 OR2           | from (Lujan et al., 2012)                    |
| h221   | see reference (DTA201Δmsh3) and dissected from diploid d281                                 | haploid | pol2-M644G         | msh3Δ URA3 OR1           | from (Clark et al., 2011)                    |
| h222   | see reference (DTA202Δmsh3) and dissected from diploid d282                                 | haploid | pol2-M644G         | msh3Δ URA3 OR2           | from (Clark et al., 2011)                    |
| h231   | dissected from diploid d281                                                                 | haploid | pol2-M644G         | msh6Δ URA3 OR1           | this study                                   |
| h232   | dissected from diploid d282                                                                 | haploid | pol2-M644G         | msh6Δ URA3 OR2           | this study                                   |
| h241   | dissected from diploid d281                                                                 | haploid | pol2-M644G         | msh3,6Δ URA3 OR1         | this study                                   |
| h242   | dissected from diploid d282                                                                 | haploid | pol2-M644G         | msh3,6Δ URA3 OR2         | this study                                   |
| h251   | see reference (SNM120) and dissected from diploid d281                                      | haploid | pol2-M644G         | rnh201Δ URA3 OR1         | expanded from (Nick McElhinny et al., 2010b) |
| h252   | see reference (SHM127) and dissected from diploid d282                                      | haploid | pol2-M644G         | rnh201Δ URA3 OR2         | expanded from (Nick McElhinny et al., 2010b) |
| h251ML | transformation of h201ML with HYG-R with RNH201 flanking DNA (Nick McElhinny et al., 2010b) | haploid | pol2-M644L         | rnh201Δ URA3 OR1         | this study                                   |
| h252ML | transformation of h201ML with HYG-R with RNH201 flanking DNA (Nick McElhinny et al., 2010b) | haploid | pol2-M644L         | rnh201Δ URA3 OR2         | this study                                   |
| h261   | see reference and dissected from diploid d281                                               | haploid | pol2-M644G         | msh3Δ rnh201Δ URA3 OR1   | expanded from (Clark et al., 2011)           |



|           |                                                                            |         |                   |                                                     |                                                                           |
|-----------|----------------------------------------------------------------------------|---------|-------------------|-----------------------------------------------------|---------------------------------------------------------------------------|
| h262      | see reference and dissected from diploid d282                              | haploid | <i>pol2-M644G</i> | <i>msh3Δ rnh201Δ URA3 OR2</i>                       | expanded from (Clark et al., 2011)                                        |
| h271      | see reference and dissected from diploid d281                              | haploid | <i>pol2-M644G</i> | <i>msh6Δ rnh201Δ URA3 OR1</i>                       | from (Clark et al., 2011)                                                 |
| h272      | see reference and dissected from diploid d282                              | haploid | <i>pol2-M644G</i> | <i>msh6Δ rnh201Δ URA3 OR2</i>                       | from (Clark et al., 2011)                                                 |
| h281      | dissected from diploid d281                                                | haploid | <i>pol2-M644G</i> | <i>msh3,6Δ rnh201Δ URA3 OR1</i>                     | expanded from (Clark et al., 2011)                                        |
| h282      | dissected from diploid d282                                                | haploid | <i>pol2-M644G</i> | <i>msh3,6Δ rnh201Δ URA3 OR2</i>                     | expanded from (Clark et al., 2011)                                        |
| h301      | see reference (DTA301) and dissected from diploid d341 or d371             | haploid | <i>pol3-L612M</i> | <i>URA3 OR1</i>                                     | expanded from (Nick McElhinny et al., 2008; Nick McElhinny et al., 2010a) |
| h302      | see reference (DTA302) and dissected from diploid d342 or d372             | haploid | <i>pol3-L612M</i> | <i>URA3 OR2</i>                                     | expanded from (Nick McElhinny et al., 2008; Nick McElhinny et al., 2010a) |
| h331      | dissected from diploid d341 or d371                                        | haploid | <i>pol3-L612M</i> | <i>msh6Δ URA3 OR1</i>                               | this study                                                                |
| h332      | dissected from diploid d342 or d372                                        | haploid | <i>pol3-L612M</i> | <i>msh6Δ URA3 OR2</i>                               | this study                                                                |
| h351      | see reference (JSW11) and dissected from diploid d371                      | haploid | <i>pol3-L612M</i> | <i>rnh201Δ URA3 OR1</i>                             | this study                                                                |
| h352      | see reference (JSW15) and dissected from diploid d372                      | haploid | <i>pol3-L612M</i> | <i>rnh201Δ URA3 OR2</i>                             | this study                                                                |
| h371      | dissected from diploid d371                                                | haploid | <i>pol3-L612M</i> | <i>msh6Δ rnh201Δ URA3 OR1</i>                       | this study                                                                |
| h372      | dissected from diploid d372                                                | haploid | <i>pol3-L612M</i> | <i>msh6Δ rnh201Δ URA3 OR2</i>                       | this study                                                                |
| d011      | also known as ySNM_1025                                                    | diploid | wild type         | <i>msh2Δ/MSH2 URA3 OR1</i>                          | from (Nick McElhinny et al., 2008)                                        |
| d012      | also known as ySNM_1028                                                    | diploid | wild type         | <i>msh2Δ/MSH2 URA3 OR2</i>                          | from (Nick McElhinny et al., 2008)                                        |
| d041      | derived from mating of h031 and h021                                       | diploid | wild type         | <i>msh3,6Δ/MSH3,6 URA3 OR1</i>                      | this study                                                                |
| d042      | derived from mating of h032 and h022                                       | diploid | wild type         | <i>msh3,6Δ/MSH3,6 URA3 OR2</i>                      | this study                                                                |
| d081      | derived from mating of h041 and h051                                       | diploid | wild type         | <i>msh3/MSH3 msh6Δ/MSH6 rnh201Δ/RNH201 URA3 OR1</i> | this study                                                                |
| d082      | derived from mating of h042 and h052                                       | diploid | wild type         | <i>msh3/MSH3 msh6Δ/MSH6 rnh201Δ/RNH201 URA3 OR2</i> | this study                                                                |
| h021      | also known as DTA101Δmsh3                                                  | haploid | wild type         | <i>msh3Δ URA3 OR1</i>                               | from (Clark et al., 2011)                                                 |
| h022      | also known as DTA102Δmsh3                                                  | haploid | wild type         | <i>msh3Δ URA3 OR2</i>                               | from (Clark et al., 2011)                                                 |
| h031      | dissected from d031                                                        | haploid | wild type         | <i>msh6Δ URA3 OR1</i>                               | this study                                                                |
| h032      | dissected from d032                                                        | haploid | wild type         | <i>msh6Δ URA3 OR2</i>                               | this study                                                                |
| d031      | transformation of ySNM_1001 with <i>TRP1</i> with <i>MSH6</i> flanking DNA | diploid | wild type         | <i>msh6Δ/MSH6 URA3 OR1</i>                          | this study                                                                |
| d032      | transformation of ySNM_1005 with <i>TRP1</i> with <i>MSH6</i> flanking DNA | diploid | wild type         | <i>msh6Δ/MSH6 URA3 OR2</i>                          | this study                                                                |
| ySNM 1001 | transformation of DTA101 with plasmid YEphO                                | diploid | wild type         | <i>URA3 OR1</i>                                     | from (Nick McElhinny et al., 2008)                                        |
| ySNM 1005 | transformation of DTA102 with plasmid YEphO                                | diploid | wild type         | <i>URA3 OR2</i>                                     | from (Nick McElhinny et al., 2008)                                        |
| d341      | derived from mating of h331 and h321                                       | diploid | <i>pol3-L612M</i> | <i>msh3,6Δ/MSH3,6 URA3 OR1</i>                      | this study                                                                |
| d342      | derived from mating of h332 and h322                                       | diploid | <i>pol3-L612M</i> | <i>msh3,6Δ/MSH3,6 URA3 OR2</i>                      | this study                                                                |
| d371      | derived from mating of h331 and h351                                       | diploid | <i>pol3-L612M</i> | <i>msh6Δ/MSH6 rnh201Δ/RNH201 URA3 OR1</i>           | this study                                                                |

|        |                                                                            |         |                        |                                               |            |
|--------|----------------------------------------------------------------------------|---------|------------------------|-----------------------------------------------|------------|
| d372   | derived from mating of h332 and h352                                       | diploid | <i>pol3-L612M</i>      | <i>msh6Δ/MSH6 rnh201Δ/RNH201 URA3 OR2</i>     | this study |
| h331   | dissected from d331                                                        | haploid | <i>pol3-L612M</i>      | <i>msh6Δ URA3 OR1</i>                         | this study |
| h332   | dissected from d332                                                        | haploid | <i>pol3-L612M</i>      | <i>msh6Δ URA3 OR2</i>                         | this study |
| d331   | transformation of ySNM_1018 with <i>TRP1</i> with <i>MSH6</i> flanking DNA | diploid | <i>pol3-L612M</i>      | <i>msh6Δ/MSH6 URA3 OR1</i>                    | this study |
| d332   | transformation of ySNM_1021 with <i>TRP1</i> with <i>MSH6</i> flanking DNA | diploid | <i>pol3-L612M</i>      | <i>msh6Δ/MSH6 URA3 OR2</i>                    | this study |
| h321   | also known as DTA301Δ <i>msh3</i>                                          | haploid | <i>pol3-L612M</i>      | <i>msh3Δ URA3 OR1</i>                         | this study |
| h322   | also known as DTA302Δ <i>msh3</i>                                          | haploid | <i>pol3-L612M</i>      | <i>msh3Δ URA3 OR2</i>                         | this study |
| d211   | derived from mating of DTA201 and h211                                     | diploid | <i>pol2-M644G</i>      | <i>msh2Δ/MSH2 URA3 OR1</i>                    | this study |
| d212   | derived from mating of DTA202 and h212                                     | diploid | <i>pol2-M644G</i>      | <i>msh2Δ/MSH2 URA3 OR2</i>                    | this study |
| d281   | derived from mating of h241 and h251                                       | diploid | <i>pol2-M644G</i>      | <i>msh3,6Δ/MSH3,6 rnh201Δ/RNH201 URA3 OR1</i> | this study |
| d282   | derived from mating of h242 and h252                                       | diploid | <i>pol2-M644G</i>      | <i>msh3,6Δ/MSH3,6 rnh201Δ/RNH201 URA3 OR2</i> | this study |
| h241   | dissected from d241                                                        | haploid | <i>pol2-M644G</i>      | <i>msh3,6Δ URA3 OR1</i>                       | this study |
| h242   | dissected from d242                                                        | haploid | <i>pol2-M644G</i>      | <i>msh3,6Δ URA3 OR2</i>                       | this study |
| d241   | derived from mating h231 and h221                                          | diploid | <i>pol2-M644G</i>      | <i>msh3,6Δ/MSH3,6 URA3 OR1</i>                | this study |
| d242   | derived from mating h232 and h222                                          | diploid | <i>pol2-M644G</i>      | <i>msh3,6Δ/MSH3,6 URA3 OR2</i>                | this study |
| h231   | derived from dissection of d231                                            | haploid | <i>pol2-M644G</i>      | <i>msh6Δ URA3 OR1</i>                         | this study |
| h232   | derived from dissection of d232                                            | haploid | <i>pol2-M644G</i>      | <i>msh6Δ URA3 OR2</i>                         | this study |
| d231   | derived from dissection and back cross of d231.5                           | diploid | <i>pol2-M644G</i>      | <i>msh6Δ/MSH6 URA3 OR1</i>                    | this study |
| d232   | derived from dissection and back cross of d232.5                           | diploid | <i>pol2-M644G</i>      | <i>msh6Δ/MSH6 URA3 OR2</i>                    | this study |
| d231.5 | derived from mating h201 and h031                                          | diploid | <i>pol2-M644G/POL2</i> | <i>msh6Δ/MSH6 URA3 OR1</i>                    | this study |
| d232.5 | derived from mating h202 and h032                                          | diploid | <i>pol2-M644G/POL2</i> | <i>msh6Δ/MSH6 URA3 OR2</i>                    | this study |

All strains are descended from Δ(-2)-7B-YUNI300 (Pavlov et al., 2001) and have the following genotypic markers (homozygous in diploids): *CAN1*, *his7-2*, *leu2-Δ::kanMX*, *ura3-Δ::*, *trp1-289*, *ade2-1*, *lys2-ΔGG2899-2900*. *OR1* and *OR2* refer to *URA3* orientations at the *AGPI* locus on *Saccharomyces cerevisiae* chromosome 3: the *URA3* coding strand is the leading strand template in *OR1* and the lagging strand template in *OR2*.

**Table S6. Mutation rates, Related to Figure 2**

|                       | <i>RNH201</i>     | MMR alleles | mutation rate ( $\times 10^{-7}$ ) | 95% confidence | 5-FOA <sup>R</sup> mutants | wild type <i>URA3</i> | <i>URA3</i> mutations | Transitions |      | Frameshifts |      |        |      |
|-----------------------|-------------------|-------------|------------------------------------|----------------|----------------------------|-----------------------|-----------------------|-------------|------|-------------|------|--------|------|
|                       |                   |             |                                    |                |                            |                       |                       | count       | rate | count       | rate |        |      |
| <i>pol2-M644G</i>     | URA3 OR1          | +           | <i>wt</i>                          | 1.7            | (1.3-2.3)                  | 342                   | 105                   | 237         | 24   | 0.12        | 12   | 0.060  |      |
|                       |                   | +           | <i>msh6Δ</i>                       | 110            | (82-150)                   | 219                   | 26                    | 205         | 130  | 65          | 12   | 6.0    |      |
|                       |                   | Δ           | <i>wt</i>                          | 7.6            | (4.3-10)                   | 128                   | 4                     | 125         | 25   | 1.5         | 7    | 0.42   |      |
|                       |                   | Δ           | <i>msh6Δ</i>                       | 170            | (130-220)                  | 141                   | 10                    | 133         | 82   | 99          | 7    | 8.4    |      |
|                       | URA3 OR2          | +           | <i>wt</i>                          | 0.83           | (0.71-0.96)                | 246                   | 123                   | 124         | 36   | 0.12        | 14   | 0.047  |      |
|                       |                   | +           | <i>msh6Δ</i>                       | 54             | (40-75)                    | 181                   | 38                    | 149         | 79   | 24          | 10   | 3.0    |      |
|                       |                   | Δ           | <i>wt</i>                          | 14             | (9.8-20)                   | 138                   | 0                     | 138         | 5    | 0.51        | 7    | 0.71   |      |
|                       |                   | Δ           | <i>msh6Δ</i>                       | 81             | (57-110)                   | 134                   | 20                    | 126         | 65   | 39          | 3    | 1.8    |      |
|                       | URA3 OR1          | +           | <i>msh3Δ</i>                       | 1.6            | (1.1-2.5)                  | 122                   | 15                    | 109         | 9    | 0.12        | 50   | 0.66   |      |
|                       |                   | +           | <i>msh3,6Δ</i>                     | 110            | (88-140)                   | 173                   | 16                    | 166         | 67   | 43          | 56   | 36     |      |
|                       |                   | Δ           | <i>msh3Δ</i>                       | 11             | (8.8-14)                   | 137                   | 17                    | 120         | 19   | 1.5         | 26   | 2.1    |      |
|                       |                   | Δ           | <i>msh3,6Δ</i>                     | 250            | (170-350)                  | 164                   | 18                    | 154         | 64   | 98          | 67   | 100    |      |
|                       | URA3 OR2          | +           | <i>msh3Δ</i>                       | 2.9            | (2.2-3.9)                  | 125                   | 17                    | 108         | 4    | 0.093       | 88   | 2.0    |      |
|                       |                   | +           | <i>msh3,6Δ</i>                     | 280            | (220-370)                  | 158                   | 16                    | 144         | 34   | 60          | 80   | 140    |      |
|                       |                   | Δ           | <i>msh3Δ</i>                       | 15             | (11-21)                    | 139                   | 21                    | 118         | 3    | 0.32        | 33   | 3.6    |      |
|                       |                   | Δ           | <i>msh3,6Δ</i>                     | 280            | (210-360)                  | 122                   | 22                    | 102         | 30   | 69          | 54   | 120    |      |
|                       | OR1               | +           | <i>msh2Δ</i>                       | 180            | (120-270)                  | 333                   | 35                    | 306         | 92   | 50          | 162  | 88     |      |
|                       | OR2               | +           | <i>msh2Δ</i>                       | 180            | (100-220)                  | 254                   | 38                    | 224         | 83   | 59          | 85   | 60     |      |
|                       | <i>pol3-L612M</i> | URA3 OR1    | +                                  | <i>wt</i>      | 1.4                        | (1.1-1.8)             | 245                   | 72          | 173  | 112         | 0.64 | 20     | 0.11 |
|                       |                   |             | +                                  | <i>msh6Δ</i>   | 170                        | (130-230)             | 313                   | 14          | 310  | 271         | 150  | 6      | 3.3  |
| Δ                     |                   |             | <i>wt</i>                          | 1.4            | (0.97-2.1)                 | 151                   | 28                    | 123         | 60   | 0.56        | 22   | 0.20   |      |
| Δ                     |                   |             | <i>msh6Δ</i>                       | 180            | (130-260)                  | 142                   | 13                    | 132         | 117  | 150         | 8    | 10     |      |
| URA3 OR2              |                   | +           | <i>wt</i>                          | 2.3            | (2.0-2.7)                  | 243                   | 45                    | 198         | 87   | 0.82        | 34   | 0.32   |      |
|                       |                   | +           | <i>msh6Δ</i>                       | 160            | (130-210)                  | 354                   | 27                    | 335         | 241  | 110         | 5    | 2.3    |      |
|                       |                   | Δ           | <i>wt</i>                          | 1.1            | (0.84-1.5)                 | 188                   | 45                    | 143         | 45   | 0.26        | 23   | 0.13   |      |
|                       |                   | Δ           | <i>msh6Δ</i>                       | 180            | (140-230)                  | 70                    | 4                     | 71          | 57   | 150         | 1    | 2.6    |      |
| wild type polymerases | URA3 OR1          | +           | <i>wt</i>                          | 0.2            | (0.14-0.23)                | 211                   | 70                    | 141         | 47   | 0.040       | 11   | 0.0094 |      |
|                       |                   | +           | <i>msh3,6Δ</i>                     | 8.1            | (6.1-11)                   | 228                   | 63                    | 170         | 38   | 1.4         | 100  | 3.6    |      |
|                       |                   | Δ           | <i>wt</i>                          | 0.3            | (0.22-0.46)                | 251                   | 95                    | 156         | 32   | 0.041       | 27   | 0.034  |      |
|                       |                   | Δ           | <i>msh3,6Δ</i>                     | 10             | (6.5-14)                   | 298                   | 92                    | 206         | 76   | 2.4         | 98   | 3.2    |      |
|                       | URA3 OR2          | +           | <i>wt</i>                          | 0.21           | (0.16-0.27)                | 257                   | 99                    | 158         | 43   | 0.035       | 14   | 0.011  |      |
|                       |                   | +           | <i>msh3,6Δ</i>                     | 7.8            | (6.1-10)                   | 258                   | 79                    | 186         | 32   | 0.97        | 113  | 3.4    |      |
|                       |                   | Δ           | <i>wt</i>                          | 0.64           | (0.43-0.75)                | 273                   | 62                    | 211         | 32   | 0.075       | 14   | 0.033  |      |
|                       |                   | Δ           | <i>msh3,6Δ</i>                     | 12             | (8.8-17)                   | 244                   | 49                    | 196         | 37   | 1.8         | 99   | 4.9    |      |
|                       | OR1               | +           | <i>msh2Δ</i>                       | 7.2            | (3.5-15)                   | 195                   | 15                    | 180         | 41   | 1.5         | 118  | 4.4    |      |
|                       | OR2               | +           | <i>msh2Δ</i>                       | 10             | (6.7-13)                   | 193                   | 12                    | 181         | 23   | 1.1         | 113  | 5.6    |      |
| <i>pol2-M644GL</i>    | OR1               | +           | <i>wt</i>                          | 0.39           | (0.30-0.52)                | 87                    | 39                    | 49          | 8    | 0.036       | 10   | 0.045  |      |
|                       |                   | Δ           | <i>wt</i>                          | 0.50           | (0.37-0.66)                | 83                    | 31                    | 52          | 17   | 0.10        | 7    | 0.042  |      |
|                       | OR1               | +           | <i>wt</i>                          | 0.61           | (0.53-0.71)                | 101                   | 33                    | 69          | 17   | 0.10        | 18   | 0.11   |      |
|                       |                   | Δ           | <i>wt</i>                          | 0.50           | (0.45-0.56)                | 93                    | 46                    | 47          | 27   | 0.15        | 4    | 0.022  |      |

All rates are multiplied by  $10^7$ . Strain origins and related references may be found in Table S5.

**Table S7. Mutation rates in a *pol2-M644L* background for two *URA3* orientations  $\pm$  *RNH201*, Related to Figure 2**

| <i>pol2-M644L</i>                           |                 | mutation rate ( $\times 10^{-7}$ ) | 95% confidence | 5-FOA <sup>R</sup> mutants | no <i>URA3</i> change | <i>URA3</i> mutations | $\pm 1$ -base Indels |             | 2-5 bp Deletions |             |
|---------------------------------------------|-----------------|------------------------------------|----------------|----------------------------|-----------------------|-----------------------|----------------------|-------------|------------------|-------------|
|                                             |                 |                                    |                |                            |                       |                       | #                    | rate        | #                | rate        |
| <i>RNH201</i>                               | <i>URA3</i> OR1 | 0.39                               | (0.30-0.52)    | 87                         | 39                    | 49                    | 10                   | 0.045       | 3                | 0.0049      |
|                                             | <i>URA3</i> OR2 | 0.50                               | (0.37-0.66)    | 83                         | 31                    | 52                    | 7                    | 0.042       | 1                | 0.0060      |
|                                             | combined        | 0.44                               | (0.33-0.58)    | 170                        | 70                    | 101                   | 17                   | 0.043       | 4                | 0.0052      |
| <i>rnh201Δ</i>                              | <i>URA3</i> OR1 | 0.61                               | (0.53-0.71)    | 101                        | 33                    | 69                    | 18                   | 0.11        | 9                | 0.0060      |
|                                             | <i>URA3</i> OR2 | 0.50                               | (0.45-0.56)    | 93                         | 46                    | 47                    | 4                    | 0.022       | 1                | 0.0054      |
|                                             | combined        | 0.55                               | (0.49-0.63)    | 194                        | 79                    | 116                   | 22                   | 0.048       | 10               | 0.0057      |
| <b>increase upon <i>RNH201</i> deletion</b> |                 |                                    |                |                            |                       |                       |                      | <b>1.1x</b> |                  | <b>1.9x</b> |

For comparison, some rates are listed by strain in Table S6. All rates are multiplied by  $10^7$ . "Combined" rates are geometric means of rates from two *URA3* orientations (mutation rates from forward mutation experiments are lognormally distributed). Fold-increases in rates upon *RNH201* deletion are compared in Fig. 2D. Strain origins and related references may be found in Table S5.

## Supplemental References

Clark, A.B., Lujan, S.A., Kissling, G.E., and Kunkel, T.A. (2011). Mismatch repair-independent tandem repeat sequence instability resulting from ribonucleotide incorporation by DNA polymerase epsilon. *DNA Repair (Amst)* 10, 476-482.

Lujan, S.A., Williams, J.S., Pursell, Z.F., Abdulovic-Cui, A.A., Clark, A.B., Nick McElhinny, S.A., and Kunkel, T.A. (2012). Mismatch repair balances leading and lagging strand DNA replication fidelity. *PLoS Genet* 8, e1003016.

Nick McElhinny, S.A., Gordenin, D.A., Stith, C.M., Burgers, P.M., and Kunkel, T.A. (2008). Division of labor at the eukaryotic replication fork. *Mol Cell* 30, 137-144.

Nick McElhinny, S.A., Kissling, G.E., and Kunkel, T.A. (2010a). Differential correction of lagging-strand replication errors made by DNA polymerases {alpha} and {delta}. *Proc Natl Acad Sci U S A* 107, 21070-21075.

Nick McElhinny, S.A., Kumar, D., Clark, A.B., Watt, D.L., Watts, B.E., Lundstrom, E.B., Johansson, E., Chabes, A., and Kunkel, T.A. (2010b). Genome instability due to ribonucleotide incorporation into DNA. *Nat Chem Biol* 6, 774-781.

Pavlov, Y.I., Shcherbakova, P.V., and Kunkel, T.A. (2001). In vivo consequences of putative active site mutations in yeast DNA polymerases alpha, epsilon, delta, and zeta. *Genetics* 159, 47-64.

Pursell, Z.F., Isoz, I., Lundstrom, E.B., Johansson, E., and Kunkel, T.A. (2007). Yeast DNA polymerase epsilon participates in leading-strand DNA replication. *Science* 317, 127-130.
